# Supplementary figures and images for: Extracellular interface between APP and Nicastrin regulates Aβ length and response to γ‐secretase modulators
Source: PubMed Central journal article supplement — EMBO J. 2019 May 20;38(12):e101494. doi: 10.15252/embj.2019101494 (PMC6576158; doi:10.15252/embj.2019101494), 2019-05-20

Figure 2B

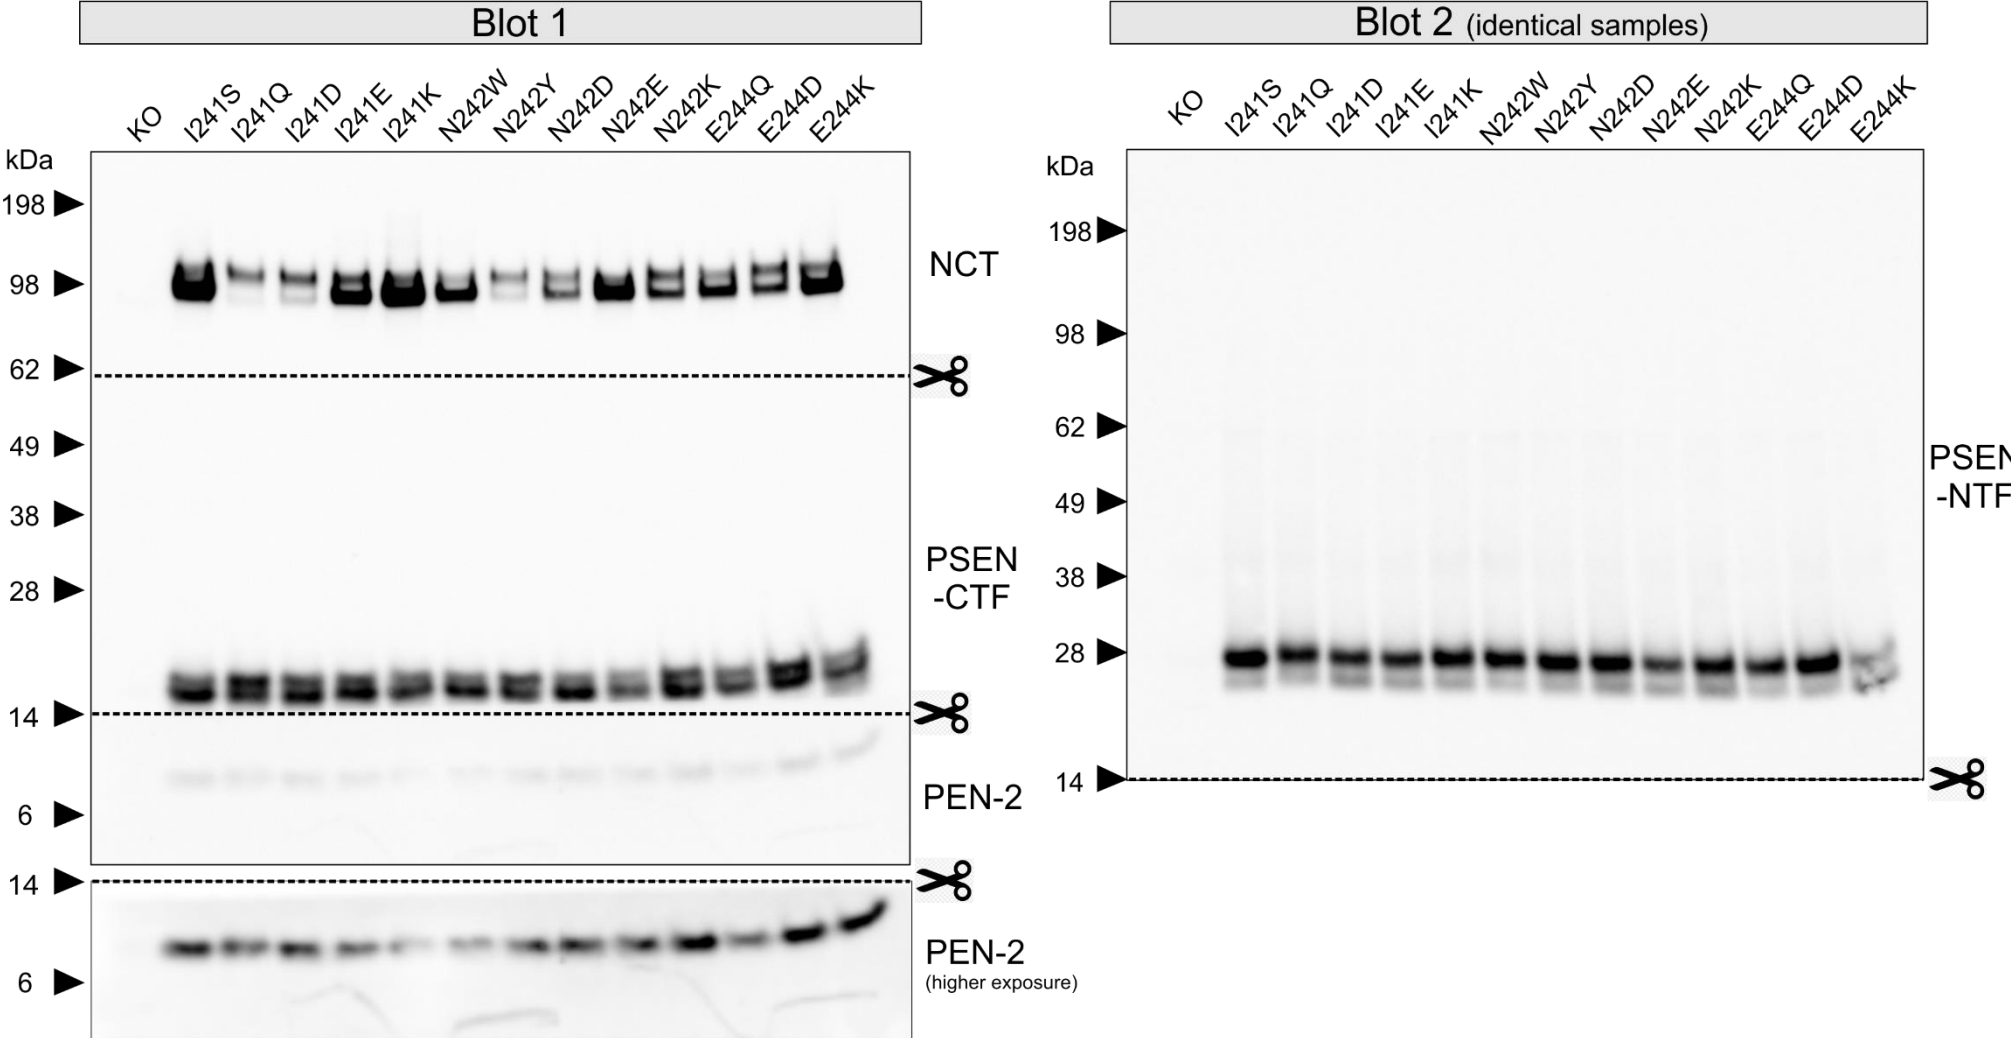

Supplement: EMBJ-38-e101494-s002.pdf [file EMBJ-38-e101494-s002.pdf]

Figure 5B

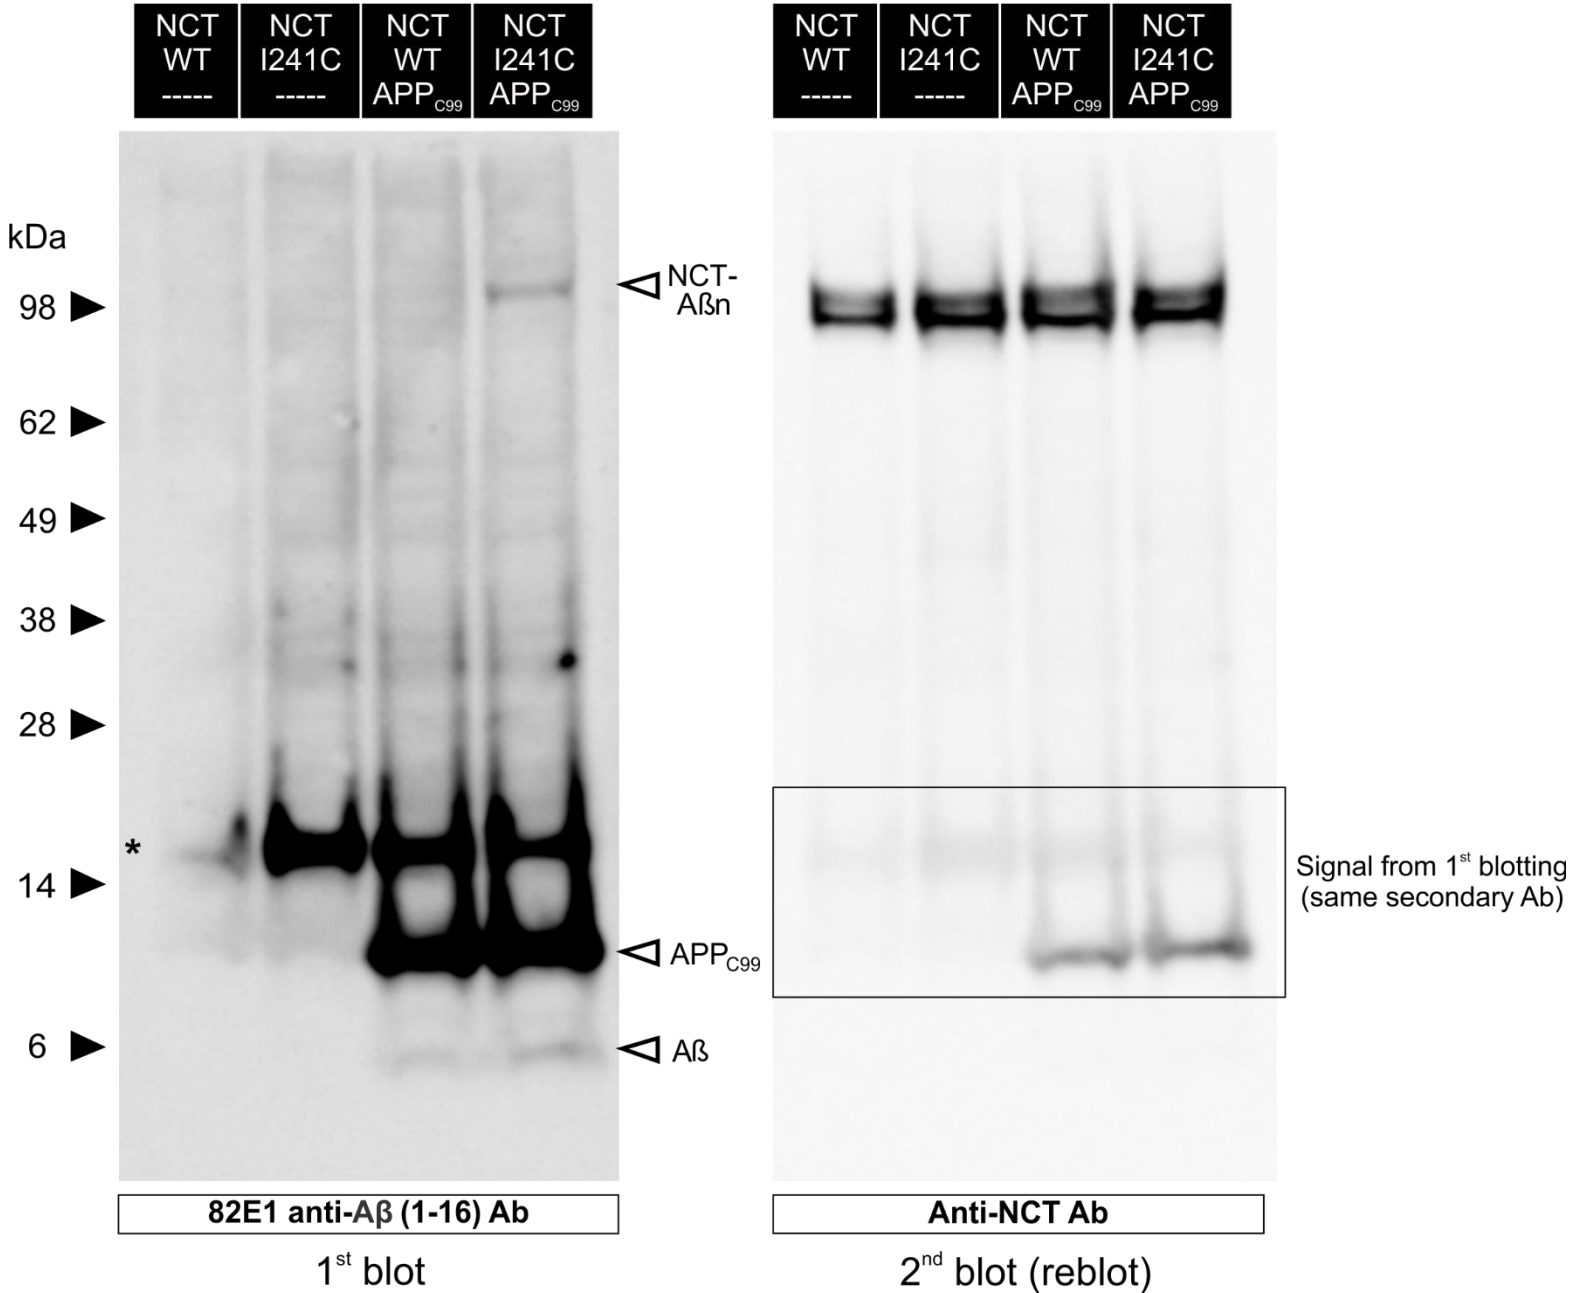

Supplement: EMBJ-38-e101494-s003.pdf [file EMBJ-38-e101494-s003.pdf]
